# Supplementary material for: Valorization of Tomato Surplus and Waste Fractions: A Case Study Using Norway, Belgium, Poland, and Turkey as Examples
Source: Foods. 2019 Jun 27;8(7):229. doi: 10.3390/foods8070229 (PMC6678325; doi:10.3390/foods8070229)
Supplement: Supplementary file 1 [file foods-08-00229-s001.xlsx]

## Sheet: All countries Europe
Country	Tomato production per year (tons) FAOSTAT 2012 if not indicated else	Fraction of total production that is industrially processed, domestically (%)	Tomato waste fraction (%) Litterature or communicated value	Domestically processed (tons)	Fresh-market + unprocessed export (tons)	Estimated waste during processing (tonnes)	Estimated waste wholesale (tonnes)	Estimated waste during processing + wholesale (tons)	Estimated waste fraction, processing and wholesale (%)	Net export (tons)	Tomato consumption (kg per capita per year) FAOSTAT	Vegetable consumption (kg per capita per year) FAOSTAT	% tomato consumption of total vegetable consumption
Turkey *	11350000	33	9.05	3745500	7604500	561825	380225	942050	8.3	4478341	94.1	241	39
Italy ¤	5409672	90.056	2,9§	4.87173e+06	537938	730760	26896.9	757657	14.0056	2731371	39.5	144.5	27.3
Spain**	4888884	29.9	8.5	1.46178e+06	3.42711e+06	219266	171355	390622	7.99	2026215	42.6	123.8	34.4
Russia**	2819000	18.57	7.14	523488	2.29551e+06	78523.2	114776	193299	6.857	-962951	23.8	109.7	21.7
Ukraine**	2172000	28.08	14.9	609898	1.5621e+06	91484.6	78105.1	169590	7.808	197352	45.3	163.6	27.7
Portugal	1392700							139270	10	984445	38.5	166.2	23.2
Greece	979600							97960	10	124998	76.9	232.1	33.1
Poland *	921000	28.75	8.5	264788	656212	39718.1	32810.6	72528.8	7.875	-140314	23.5	129.4	18.2
Netherlands	805000							80500	10	475228	19.8	83.8	23.6
France**	761693	23.23		176941	584752	26541.2	29237.6	55778.8	7.323	-712171	20.5	103.6	19.8
Rest of Europe	3142253							314225	10	-4476680	25.4735	127.706	19.7
							Values highlighted in yellow are calculated using a random factor of 10% waste from total production
Romania	683282									-353544	47.5	186.6	25.4
Azerbaijan	471612									40814	46.8	172.3	27.2
Armenia	265174									12210	85.4	311.4	27.4
Belgium***	259535		5.2							-71255	27.5	128.1	21.5
Albania	205000									29109	55.8	251.1	22.2
Serbia	155663									-52733	21.7	116.5	18.6
Macedonia	145818									35132	52.6	188.2	27.9
Belarus	138344									-459	14.7	146.8	10
Hungary	108799									-58305	16.7	93.9	17.8
Bulgaria	94016									-39861	18.3	73.2	25
United Kingdom	83500									-1328094	22.5	94.1	23.9
Georgia	63900									-13297	17.7	59	30
Germany	61188									-1509663	19	94.3	20.1
Austria	52032									-111876	19.4	109.3	17.7
Moldova	48523									-38448	24.5	113.2	21.6
Switzerland	44766									-147641	24.3	108.2	22.5
Bosnia & Hercegovina	44021									-19450	16.5	188.1	8.8
Finland	38347									-54315	17.2	88.1	19.5
Croatia	25418									-54006	18.4	81.6	22.5
Montenegro	22830									-3845	43	241.6	17.8
Sweden	14500									-199048	22.6	93.9	24.1
Cyprus	14315									-6287	18.4	103	17.9
Ireland	14000									-50877	14.3	95.3	15
Czech Republic	13317									-126933	13.2	74.1	17.8
Denmark	13270									-102018	20.7	121.8	17
Norway***	12159	0.05	5.9	6.0795	12152.9	0.911925	607.646	608.558	5.005	-68201	16.3	76.7	21.2
Lithuania	11600									-25652	12.2	125.2	9.7
Malta	11142									-5654	39.4	204.2	19.3
Slovenia	7313									-16765	11.7	80	14.6
Slovakia	6580									-73927	14.8	95.2	15.5
Latvia	5718									-27402	16	123	13
Estonia	4771									-19282	18.6	122.1	15.2
Iceland	1716									-3035	14.8	71.4	20.7
Luxembourg	84									-12072	23.6	110.5	21.4
	SUM							SUM	AVERAGE		AVERAGE	AVERAGE	AVERAGE
	37784055							3.21348e+06	9.10533		29.2461	132.609	21.2778
* 2018 data
** 2014 data
*** 2016 data
¤ Average 2012-2015
§ only left in field
Sources
Food and Agriculture Organization of the United Nations; FAOSTAT. Data from year 2012.
Daniel Palmero	Polytechnical University of Madrid	Pers. comm
Miguel de Cara	IAIPA, Almeria	Pers. comm
Monica Hanasand, Hanasand Gård og Kjøkken, personal communication
Bjarte Åsbø, Grøntprodusentenes samarbeidsråd, pers. comm
Mariya Reshetnikova, Growth Technology, Moscow, Russia, Pers. comm.
Ievgen Kuzin, International Relations Manager of Fruit-Inform, Dnipropetrovsk, Ukraine, www.fruit-inform.com
The Italian National Institute of Statistics, Istituto nazionale di Statistica (Istat).
http://agrotypos.com/2015/06/09/european-processing-tomato-industry-has-not-overcome-its-problems-since-2009/
De Luca, A., & Dever, B. (2011). Italy Tomatoes and Products Report 2011.
Rynek owoców i warzyw – stan i perspektywy, 2015, vol. 46, p.30-42. [Market of fruit and vegetables - present state and perspectives, 2015, vol. 46, p.30-42]
Turkey	11350000
Italy	5409672
Spain	4888884
Russia	2819000
Ukraine	2172000
Portugal	1392700
Greece	979600
Poland	921000
Netherlands	805000
France	761693
Romania	683282
Azerbaijan	471612
Armenia	265174
Belgium	259535
Albania	205000
Serbia	155663
North Macedonia	145818
Belarus	138344
Hungary	108799
Bulgaria	94016
United Kingdom	83500
Georgia	63900
Germany	61188
Austria	52032
Moldova	48523
Switzerland	44766
Bosnia & Hercegovina	44021
Finland	38347
Croatia	25418
Montenegro	22830
Sweden	14500
Cyprus	14315
Ireland	14000
Czech Republic	13317
Denmark	13270
Norway	12159
Lithuania	11600
Malta	11142
Slovenia	7313
Slovakia	6580
Latvia	5718
Estonia	4771
Iceland	1716
Luxembourg	84

## Sheet: Sheet2
Country	Tomato production per year (tons)	Fraction of processed tomatoes (%)	Tomato waste fraction (%)	Processed (tons)	fresh-market (tons)	Estimated waste during processing (tonnes)	Estimated waste wholesale (tonnes)	Total waste (tons)	Estimated waste fraction (%)
										Net export (tonnes)	Tomato consumption per capita per year (kg)	Vegetable consumption per capita per year (kg)	% tomato consumption of total vegetable consumption
Turkey	11350000	25	7.5	2837500	8512500	425625	425625	851250	7.5	4478341	94.1	241	39
Italy	5409672	90.056		4.87173e+06	537938	730760	26896.9	757657	14.0056	2731371	39.5	144.5	27.3
Spain	4888884	29.9		1.46178e+06	3.42711e+06	219266	171355	390622	7.99	2026215	42.6	123.8	34.4
Russia	2456100	19		466659	1989441	69998.8	99472.1	169471	6.9	-962951	23.8	109.7	21.7
Ukraine	2274100	28		636748	1637352	95512.2	81867.6	177380	7.8	197352	45.3	163.6	27.7
Portugal	1392700	86		1197722	194978	179658	9748.9	189407	13.6	984445	38.5	166.2	23.2
Greece	979600	51		499596	480004	74939.4	24000.2	98939.6	10.1	124998	76.9	232.1	33.1
Rest of Europe	5294849	15	NA	794227	4.50062e+06	119134	225031	344165	6.5	-2016180	25.1324	125.914	19.7676
Total						1.91489e+06	1.064e+06	2.97889e+06
Netherlands	805000									475228	19.8	83.8	23.6
Poland	758936	29		220091	538845	33013.7	26942.2	59955.9	7.9	-140314	23.5	129.4	18.2
Romania	683282									-353544	47.5	186.6	25.4
France	588660									-712171	20.5	103.6	19.8
Azerbaijan	471612									40814	46.8	172.3	27.2
Armenia	265174									12210	85.4	311.4	27.4
Belgium**	259535	0.05	5.2	129.768	259405	19.4651	12970.3	12989.7	5.005	-71255	27.5	128.1	21.5
Albania	205000									29109	55.8	251.1	22.2
Serbia	155663									-52733	21.7	116.5	18.6
Macedonia	145818									35132	52.6	188.2	27.9
Belarus	138344									-459	14.7	146.8	10
Hungary	108799									-58305	16.7	93.9	17.8
Bulgaria	94016									-39861	18.3	73.2	25
United Kingdom	83500									-1 328 094	22.5	94.1	23.9
Georgia	63900									-13297	17.7	59	30
Germany	61188									-1 509 663	19	94.3	20.1
Austria	52032									-111876	19.4	109.3	17.7
Moldova	48523									-38448	24.5	113.2	21.6
Switzerland	44766									-147641	24.3	108.2	22.5
Bosnia & Hercegovina	44021									-19450	16.5	188.1	8.8
Finland	38347									-54315	17.2	88.1	19.5
Croatia	25418									-54006	18.4	81.6	22.5
Montenegro	22830									-3845	43	241.6	17.8
Sweden	14500									-199048	22.6	93.9	24.1
Cyprus	14315									-6287	18.4	103	17.9
Ireland	14000									-50877	14.3	95.3	15
Czech Republic	13317									-126933	13.2	74.1	17.8
Denmark	13270									-102018	20.7	121.8	17
Norway	12159	0.05	7	6.0795	12152.9	0.911925	607.646	608.558	5.005	-68201	16.3	76.7	21.2
Lithuania	11600									-25652	12.2	125.2	9.7
Malta	11142									-5654	39.4	204.2	19.3
Slovenia	7313									-16765	11.7	80	14.6
Slovakia	6580									-73927	14.8	95.2	15.5
Latvia	5718									-27402	16	123	13
Estonia	4771									-19282	18.6	122.1	15.2
Iceland	1716									-3035	14.8	71.4	20.7
Luxembourg	84									-12072	23.6	110.5	21.4
	SUM										AVERAGE	AVERAGE	AVERAGE
	39340754										29.2385	132.569	21.2793

## Sheet: Sheet1
Country	Tomato production per year (tons)
Turkey	11350000	851250
Italy	5409672	757657
Spain	4888884	390622
Russia	2456100	169471
Ukraine	2274100	177380
Portugal	1392700	189407
Greece	979600	98939.6
Netherlands	805000
Poland	758936
Romania	683282
France	588660
Azerbaijan	471612
Armenia	265174
Belgium	231800	11590
Albania	205000
Serbia	155663
Macedonia	145818
Belarus	138344
Hungary	108799
Bulgaria	94016
United Kingdom	83500
Georgia	63900
Germany	61188
Austria	52032
Moldova	48523
Switzerland	44766
Bosnia & Hercegovina	44021
Finland	38347
Croatia	25418
Montenegro	22830
Sweden	14500
Cyprus	14315
Ireland	14000
Czech Republic	13317
Denmark	13270
Norway	12159	609
Lithuania	11600
Malta	11142
Slovenia	7313
Slovakia	6580
Latvia	5718
Estonia	4771
Iceland	1716
Luxembourg	84

## Sheet: Sheet3
	tot. Prod	waste	%
Turkey	11350000	851250	7.5
Italy	5409672	757657	14.0056
Spain	4888884	390622	7.99
Russia	2456100	169471	6.9
Ukraine	2274100	177380	7.8
Portugal	1392700	189407	13.6
Greece	979600	98939.6	10.1
Belgium	231800	11590	5
Norway	12159	609	5.00864
Rest of Europe	5023155	330163	6.57283
